# Supplementary material for: Heroic music stimulates empowering thoughts during mind-wandering
Source: PubMed Central journal article supplement (PMC6635482; doi:10.1038/s41598-019-46266-w), 2019-07-16
Supplement: 41598_2019_46266_MOESM3_ESM.pdf [file 41598_2019_46266_MOESM3_ESM.pdf]

# Heroic music stimulates empowering thoughts during mind-wandering

Stefan Koelsch<sup>1,\*</sup>, Tobias Bashevkin<sup>1</sup>, Joakim Kristensen<sup>1</sup>, Jonas Tvedt<sup>1</sup>, and Sebastian Jentschke<sup>1</sup>

<sup>1</sup>University of Bergen, Department of Biological and Medical Psychology, Postboks 7807, 5020 Bergen, Norway  
\*stefan.koelsch@uib.no

## Supplementary Table S1

Overview of descriptive statistics for the items assessing thought content and positive-negative affect after the presentation of heroic or sad music excerpts. The reported statistics controlled for physiological arousal, and include only trials where mind-wandering occurred (using a cutoff value of -1 on the questionnaire item "How much were you thinking about the music vs. something else?").

| Item topic                                              | heroic |     | sad  |      |
|---------------------------------------------------------|--------|-----|------|------|
|                                                         | M      | SD  | M    | SD   |
| Items assessing thought-content                         |        |     |      |      |
| «Valence»                                               | 1.15   | .11 | -.06 | .12  |
| «Arousal»                                               | 1.10   | .11 | -.50 | .11  |
| «Motivation»                                            | 1.13   | .11 | -.70 | .13  |
| «Constructiveness»                                      | .93    | .10 | -.04 | .103 |
| Positive-negative affect scale, short form <sup>1</sup> |        |     |      |      |
| Positive affect                                         | .22    | .05 | -.49 | .05  |
| Negative affect                                         | -.12   | .03 | .08  | .03  |
| «inspired»                                              | .51    | .08 | -.38 | .08  |
| «determined»                                            | .35    | .07 | -.51 | .07  |
| «active»                                                | .24    | .07 | -.70 | .07  |
| «afraid»                                                | -.22   | .04 | .15  | .04  |
| «alert»                                                 | .18    | .07 | -.34 | .07  |

## References

1. Thompson, E. R. Development and validation of an internationally reliable short-form of the positive and negative affect schedule (PANAS). *J. cross-cultural psychology* **38**, 227–242 (2007).
