# Supplementary material for: Heroic music stimulates empowering thoughts during mind-wandering
Source: PubMed Central journal article supplement (PMC6635482; doi:10.1038/s41598-019-46266-w), 2019-07-16
Supplement: 41598_2019_46266_MOESM4_ESM.pdf [file 41598_2019_46266_MOESM4_ESM.pdf]

# Heroic music stimulates empowering thoughts during mind-wandering

Stefan Koelsch<sup>1,\*</sup>, Tobias Bashevkin<sup>1</sup>, Joakim Kristensen<sup>1</sup>, Jonas Tvedt<sup>1</sup>, and Sebastian Jentschke<sup>1</sup>

<sup>1</sup>University of Bergen, Department of Biological and Medical Psychology, Postboks 7807, 5020 Bergen, Norway  
\*stefan.koelsch@uib.no

## Supplementary Table S2

Overview of the results from analyses of variance for items assessing thought content and positive-negative affect for all trials (i.e., regardless of whether participants reported mind-wandering for this trial or not). Items are arranged as in Table 1 to ease comparison.

| Item topic                                                    | Significant effects              | F-Value               | Sign.       | Effect size |
|---------------------------------------------------------------|----------------------------------|-----------------------|-------------|-------------|
| <b>Items assessing thought-content</b>                        |                                  |                       |             |             |
| «Valence»                                                     | heroic-sad                       | $F_{(1,60)} = 60.80$  | $p < .0001$ | $d = 2.06$  |
| «Arousal»                                                     | heroic-sad                       | $F_{(1,60)} = 100.90$ | $p < .0001$ | $d = 2.59$  |
| «Motivation»                                                  | heroic-sad                       | $F_{(1,60)} = 90.74$  | $p < .0001$ | $d = 2.46$  |
| «Constructiveness»                                            | heroic-sad                       | $F_{(1,60)} = 38.20$  | $p < .0001$ | $d = 1.60$  |
| «Meta-awareness»                                              | no significant effects           |                       |             |             |
| «Controlled focus of attention»                               | no significant effects           |                       |             |             |
| «Self-involvement»                                            | no significant effects           |                       |             |             |
| «Involvement of others»                                       | no significant effects           |                       |             |             |
| «Temporal orientation of thoughts»                            | no significant effects           |                       |             |             |
| «Relevance to current life-situation»                         | heroic-sad x tempo x pres. order | $F_{(2,58)} = 6.99$   | $p = .0019$ | $d = .98$   |
| <b>Positive-negative affect scale, short form<sup>1</sup></b> |                                  |                       |             |             |
| «positive affect»                                             | heroic-sad                       | $F_{(1,60)} = 58.79$  | $p < .0001$ | $d = 1.98$  |
| «negative affect»                                             | heroic-sad                       | $F_{(1,60)} = 15.51$  | $p = .0002$ | $d = 1.02$  |
| «inspired»                                                    | heroic-sad                       | $F_{(1,60)} = 55.18$  | $p < .0001$ | $d = 1.92$  |
| «determined»                                                  | heroic-sad                       | $F_{(1,60)} = 50.54$  | $p < .0001$ | $d = 1.83$  |
| «active»                                                      | heroic-sad                       | $F_{(1,60)} = 67.30$  | $p < .0001$ | $d = 2.12$  |
| «afraid»                                                      | heroic-sad                       | $F_{(1,60)} = 18.63$  | $p < .0001$ | $d = 1.11$  |
| «alert»                                                       | heroic-sad                       | $F_{(1,60)} = 26.43$  | $p < .0001$ | $d = 1.33$  |
| «ashamed»                                                     | heroic-sad                       | $F_{(1,60)} = 9.70$   | $p = .0028$ | $d = .80$   |
| «upset»                                                       | heroic-sad                       | $F_{(1,60)} = 11.82$  | $p = .0011$ | $d = .89$   |
| «attentive»                                                   | heroic-sad                       | $F_{(1,60)} = 15.85$  | $p = .0001$ | $d = 1.03$  |
| «hostile»                                                     | no significant effects           |                       |             |             |
| «nervous»                                                     | no significant effects           |                       |             |             |

## References

1. Thompson, E. R. Development and validation of an internationally reliable short-form of the positive and negative affect schedule (PANAS). *J. cross-cultural psychology* **38**, 227–242 (2007).
