# Supplementary material for: Heroic music stimulates empowering thoughts during mind-wandering
Source: PubMed Central journal article supplement (PMC6635482; doi:10.1038/s41598-019-46266-w), 2019-07-16
Supplement: 41598_2019_46266_MOESM5_ESM.pdf [file 41598_2019_46266_MOESM5_ESM.pdf]

# Heroic music stimulates empowering thoughts during mind-wandering

Stefan Koelsch<sup>1,\*</sup>, Tobias Bashevkin<sup>1</sup>, Joakim Kristensen<sup>1</sup>, Jonas Tvedt<sup>1</sup>, and Sebastian Jentschke<sup>1</sup>

<sup>1</sup>University of Bergen, Department of Biological and Medical Psychology, Postboks 7807, 5020 Bergen, Norway  
\*stefan.koelsch@uib.no

## Supplementary Table S3

Overview of the music stimuli used in the main experiment.

Column «T» denotes the tempo pair the piece belonged to (1: slow (64 BPM), 2: medium (95 BPM) or 3: high (115 BPM); blank if the music excerpt was not chosen to be used in the main experiment), column «E» denotes the emotional expression of the piece (H: heroic, S: sad).

| T | E | Composer / artist                 | Title                                           | Genre            |
|---|---|-----------------------------------|-------------------------------------------------|------------------|
| 1 | H | Cesc Vilà, Fran Soto              | Epic Soul Factory<br>Legendary                  | Neo-orchestral   |
| 1 | S | Gustav Holst                      | Venus, the bringer of peace (from: The Planets) | Orchestral       |
| 2 | H | Fearless Motivation Instrumentals | Addicted to Success (Epic Instrumental)         | Neo-orchestral   |
| 2 | S | Ólafur Arnalds                    | Film credits                                    | String Orchestra |
| 3 | H | Spirit of America Ensemble        | Heroic march                                    | Orchestral       |
| 3 | S | Ennio Morricone                   | Hamlet                                          | Orchestral       |
