# Supplementary material for: Heroic music stimulates empowering thoughts during mind-wandering
Source: PubMed Central journal article supplement (PMC6635482; doi:10.1038/s41598-019-46266-w), 2019-07-16
Supplement: 41598_2019_46266_MOESM6_ESM.pdf [file 41598_2019_46266_MOESM6_ESM.pdf]

# Heroic music stimulates empowering thoughts during mind-wandering

Stefan Koelsch<sup>1,\*</sup>, Tobias Bashevkin<sup>1</sup>, Joakim Kristensen<sup>1</sup>, Jonas Tvedt<sup>1</sup>, and Sebastian Jentschke<sup>1</sup>

<sup>1</sup>University of Bergen, Department of Biological and Medical Psychology, Postboks 7807, 5020 Bergen, Norway  
\*stefan.koelsch@uib.no

## Supplementary Table S4

Questionnaire used for stimulus selection.

| Item question                                                                                                                                      | Response options                                                                                                                                                                                                                                                                                                                                                                                                                                                                     |
|----------------------------------------------------------------------------------------------------------------------------------------------------|--------------------------------------------------------------------------------------------------------------------------------------------------------------------------------------------------------------------------------------------------------------------------------------------------------------------------------------------------------------------------------------------------------------------------------------------------------------------------------------|
| 1 <i>Synes du musikken var ubehagelig eller behagelig?</i><br>Do you think the music was unpleasant or pleasant?                                   | 1: Svært ubehagelig, 7: Svært behagelig<br>1: Very unpleasant, 7: Very pleasant                                                                                                                                                                                                                                                                                                                                                                                                      |
| 2 <i>Synes du musikken var rolig eller energisk?</i><br>Do you think that the music was calm or energetic?                                         | 1: Svært rolig, 7: Svært energisk<br>1: Very calm, 7: Very energetic                                                                                                                                                                                                                                                                                                                                                                                                                 |
| 3 <i>I hvor stor grad vil du beskrive musikken som trist?</i><br>To what degree do you would you describe the music as sad?                        | 1: Ikke i det hele tatt, 7: Svært mye<br>1: Not at all, 7: Very much                                                                                                                                                                                                                                                                                                                                                                                                                 |
| 4 <i>I hvor stor grad vil du beskrive musikken som heroisk (helteaktig)?</i><br>To what degree do you would you describe the music as heroic?      | 1: Ikke i det hele tatt, 7: Svært mye<br>1: Not at all, 7: Very much                                                                                                                                                                                                                                                                                                                                                                                                                 |
| 5 <i>I hvor stor grad vil du beskrive musikken som nostalgisk?</i><br>To what degree do you would you describe the music as nostalgic?             | 1: Ikke i det hele tatt, 7: Svært mye<br>1: Not at all, 7: Very much                                                                                                                                                                                                                                                                                                                                                                                                                 |
| 6 <i>I hvor stor grad vil du beskrive musikken som kraftfull?</i><br>To what degree do you would you describe the music as powerful?               | 1: Ikke i det hele tatt, 7: Svært mye<br>1: Not at all, 7: Very much                                                                                                                                                                                                                                                                                                                                                                                                                 |
| 7 <i>I hvor stor grad vil du beskrive musikken som inspirerende?</i><br>To what degree do you would you describe the music as inspiring?           | 1: Ikke i det hele tatt, 7: Svært mye<br>1: Not at all, 7: Very much                                                                                                                                                                                                                                                                                                                                                                                                                 |
| 8 <i>I hvor stor grad vil du beskrive musikken som fredfull?</i><br>To what degree do you would you describe the music as peaceful?                | 1: Ikke i det hele tatt, 7: Svært mye<br>1: Not at all, 7: Very much                                                                                                                                                                                                                                                                                                                                                                                                                 |
| 9 <i>I hvor stor grad vil du beskrive musikken som modig (uttrykker mot)?</i><br>To what degree do you would you describe the music as courageous? | 1: Ikke i det hele tatt, 7: Svært mye<br>1: Not at all, 7: Very much                                                                                                                                                                                                                                                                                                                                                                                                                 |
| 10 <i>Hørtes musikken kjent ut?</i><br><br>Did the music sound familiar?                                                                           | 1: Ikke kjent, har ikke hørt den før.<br>2: Vet ikke, tror ikke jeg har hørt den før.<br>3: Litt kjent, har kanskje hørt den før.<br>4: Ganske kjent, tror jeg har hørt den før.<br>5: Veldig kjent, har hørt den før.<br>1: Not at all, I have not heard it before.<br>2: I don't know, I don't think I've heard it before.<br>3: Somewhat familiar, I've might heard it before.<br>4: Quite familiar, I think I've heard it before.<br>5: Very well known, I have heard it before. |
