# Supplementary material for: Heroic music stimulates empowering thoughts during mind-wandering
Source: PubMed Central journal article supplement (PMC6635482; doi:10.1038/s41598-019-46266-w), 2019-07-16
Supplement: 41598_2019_46266_MOESM7_ESM.pdf [file 41598_2019_46266_MOESM7_ESM.pdf]

# Heroic music stimulates empowering thoughts during mind-wandering

Stefan Koelsch<sup>1,\*</sup>, Tobias Bashevkin<sup>1</sup>, Joakim Kristensen<sup>1</sup>, Jonas Tvedt<sup>1</sup>, and Sebastian Jentschke<sup>1</sup>

<sup>1</sup>University of Bergen, Department of Biological and Medical Psychology, Postboks 7807, 5020 Bergen, Norway

\*stefan.koelsch@uib.no

## Supplementary Table S5

Questionnaire used to assess thought-content after being exposed to the music excerpts.

| Item question                                                                                                                                                                                                                                                                                                 | Response options                                                                                                                                                                                           |
|---------------------------------------------------------------------------------------------------------------------------------------------------------------------------------------------------------------------------------------------------------------------------------------------------------------|------------------------------------------------------------------------------------------------------------------------------------------------------------------------------------------------------------|
| 1 <i>Hvor mye tenkte du på musikken vs noe annet?</i><br>How much were you thinking about the music vs. something else?                                                                                                                                                                                       | <i>1: Bare på musikken, 4: På både musikken og andre ting i like stor grad, 7: Bare på noe annet</i><br>1: Only on the music, 4: About both the music and other things alike, 7: Only about something else |
| 2 <i>Hvor mye følte du at du hadde bevisst kontroll over dine tanker?</i><br>Did you feel like you had control over where your thoughts went?                                                                                                                                                                 | <i>1: Svært lite kontroll, 7: svært mye kontroll</i><br>1: Very little control, 7: Very much control                                                                                                       |
| 3 <i>Hvor bevisst var du på hvor oppmerksomheten din var fokusert?</i><br>How aware were you of where your attention was focused?                                                                                                                                                                             | <i>1: Helt bevisst, 7: Helt ubevisst</i><br>1: Fully aware, 7: Not aware at all                                                                                                                            |
| 4 <i>Var tankene dine relatert til noe som har personlig relevans for deg (for eksempel tanker om deg selv eller et forhold du har/har hatt)?</i><br>Were your thoughts related to something that is personally relevant to you (e.g thoughts about your self or a relationship you have/had)?                | <i>1: Ikke i det hele tatt, 4: Litt, 7: Veldig mye</i><br>1: Not at all, 4: A little, 7: Very much                                                                                                         |
| 5 <i>Var tankene dine relatert til andre personer?</i><br>Were your thoughts related to other people?                                                                                                                                                                                                         | <i>1: Ikke i det hele tatt, 4: Litt, 7: Veldig mye</i><br>1: Not at all, 4: A little, 7: Very much                                                                                                         |
| 6 <i>Var det du tenkte på negativt eller positivt?</i><br>Was what you were thinking about rather negative or positive?                                                                                                                                                                                       | <i>1: Veldig negativt, 4: Nøytralt, 7: Veldig positivt</i><br>1: Very negative, 4: Neutral; 7: Very positive                                                                                               |
| 7 <i>Var det du tenkte på (noe som ville gjort deg) rolig (avslappet) eller aktivert (oppspilt, stresset, opphisset, energisk)?</i><br>Were the contents of your thoughts about something (that would make you) calm (relaxed) or aroused (excited, stressed, agitated, energetic)?                           | <i>1: Veldig rolig, 4: Nøytralt, 7: Veldig aktivert</i><br>1: Very calm, 4: Neutral, 7: Very activated                                                                                                     |
| 8 <i>Var det du tenkte på relatert til fortid nåtid eller fremtiden?</i><br>Were your thought contents related to the past, present or the future?                                                                                                                                                            | <i>1: Fjern fortid, 4: Nåtid, 7: Fjern fremtid, X: Tidløst</i><br>1: Distant past, 4: Present, 7: Distant future, X: Timeless                                                                              |
| 9 <i>Hvor relevant var det du tenkte på til din nåværende livssituasjon?</i><br>How relevant were your thoughts for your current life situation?                                                                                                                                                              | <i>1: Svært lite relevant, 7: Svært relevant</i><br>1: Very little relevance, 7: Very strong relevance                                                                                                     |
| 10 <i>Hvor konstruktive eller destruktive vil du si at tankene dine var?</i><br>How constructive or destructive was your thoughts?                                                                                                                                                                            | <i>1: Veldig destruktive, 4: Nøytral, 7: Veldig konstruktive</i><br>1: Very destructive, 4: Neutral, 7: Very constructive                                                                                  |
| 11 <i>Motiverte tankene dine deg til å gjøre noe passivt (f.eks. slappe av, prokrastinere) eller noe aktivt (f.eks. utføre en oppgave, sosialisere, trene)?</i><br>Did your thoughts motivate you to act rather passively (e.g relax, procrastinate) or rather actively (perform a task, socialize, exercise) | <i>1: Veldig passiv, 4: Nøytral, 7: Veldig aktiv</i><br>1: Very passively, 4: Neutral, 7: Very actively                                                                                                    |
